# Supplementary material
Source: Springer Nature journal article supplement (https://www.springermedizin.de/resource/supplementary/12889_2012_5212_MOESM3_ESM.pdf/9495550)

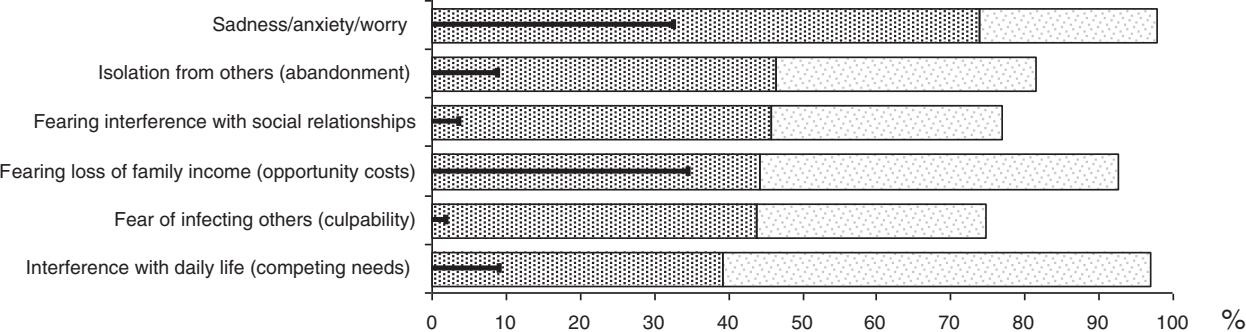

— *most important*

▒ *spontaneous*

◻ *probed*

Supplement: MOESM3 [file 9495550]
